# Supplementary material for: A stem cell based in vitro model of NAFLD enables the analysis of patient specific individual metabolic adaptations in response to a high fat diet and AdipoRon interference
Source: PubMed Central journal article supplement (PMC7860118; doi:10.1242/bio.054189), 2021-01-25
Supplement: biolopen-10-054189-s1.pdf [file biolopen-10-054189-s1.pdf]

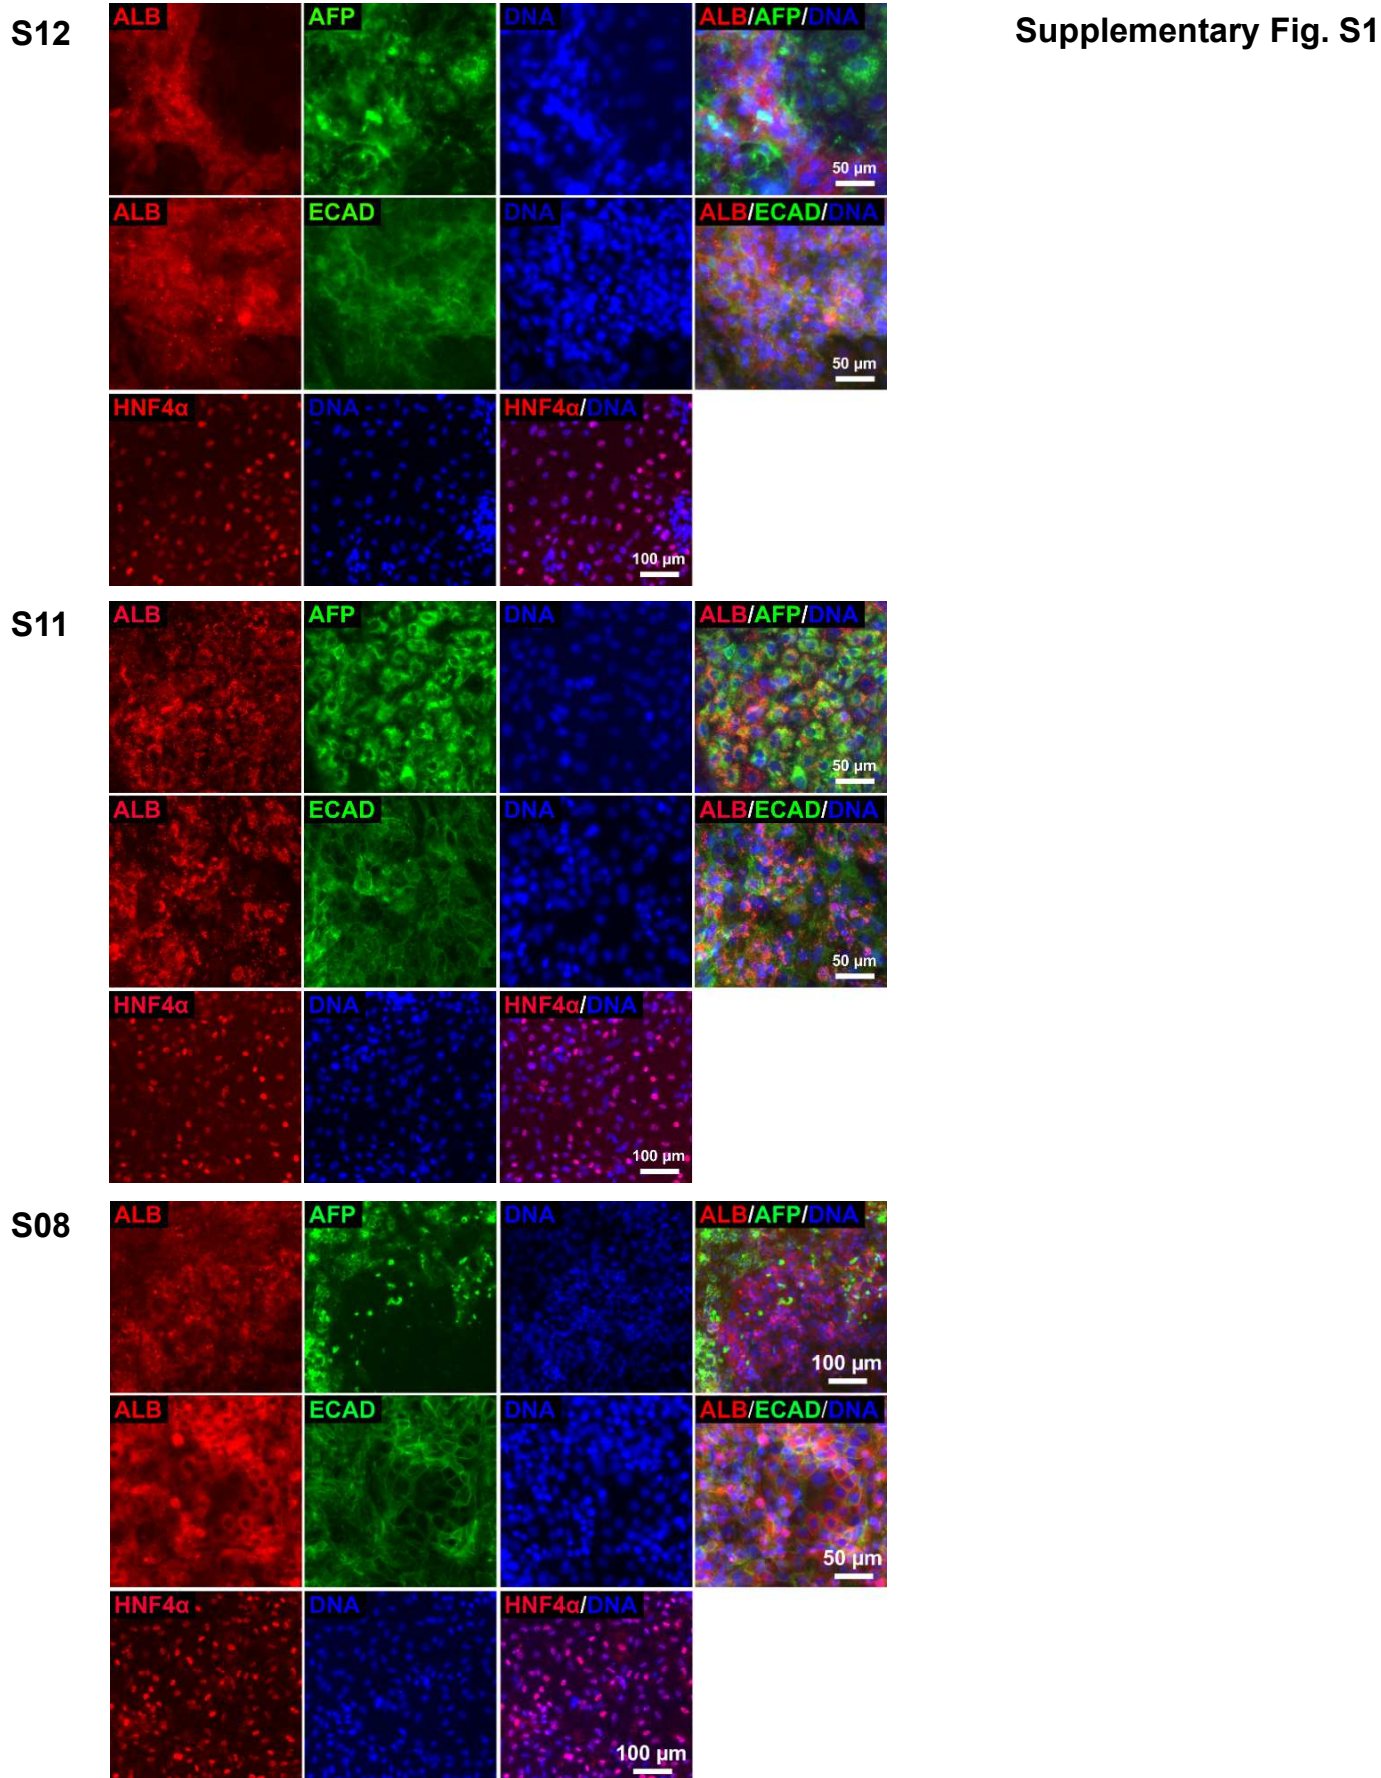

## Supplementary Fig. S2

S12

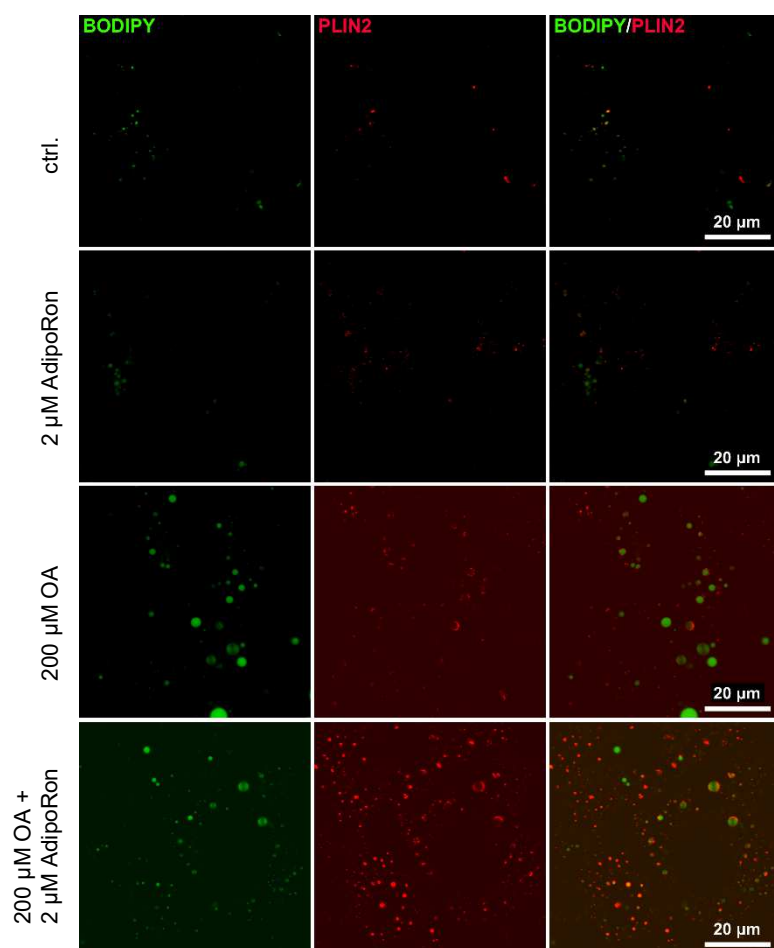

S11

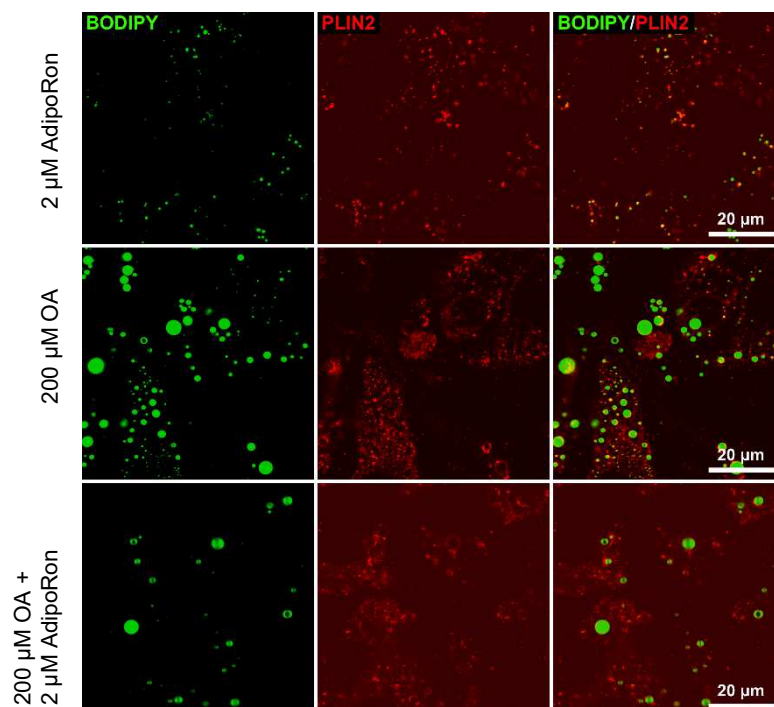

**Fig. S2: Confocal pictures of HLCs.** Representative immunocytochemistry of hepatocyte markers at the end of HLC differentiation for the lines S12 and S11. LDs (BODIPY 493/593, green), PLIN2 (red).

### Supplementary Fig. S3

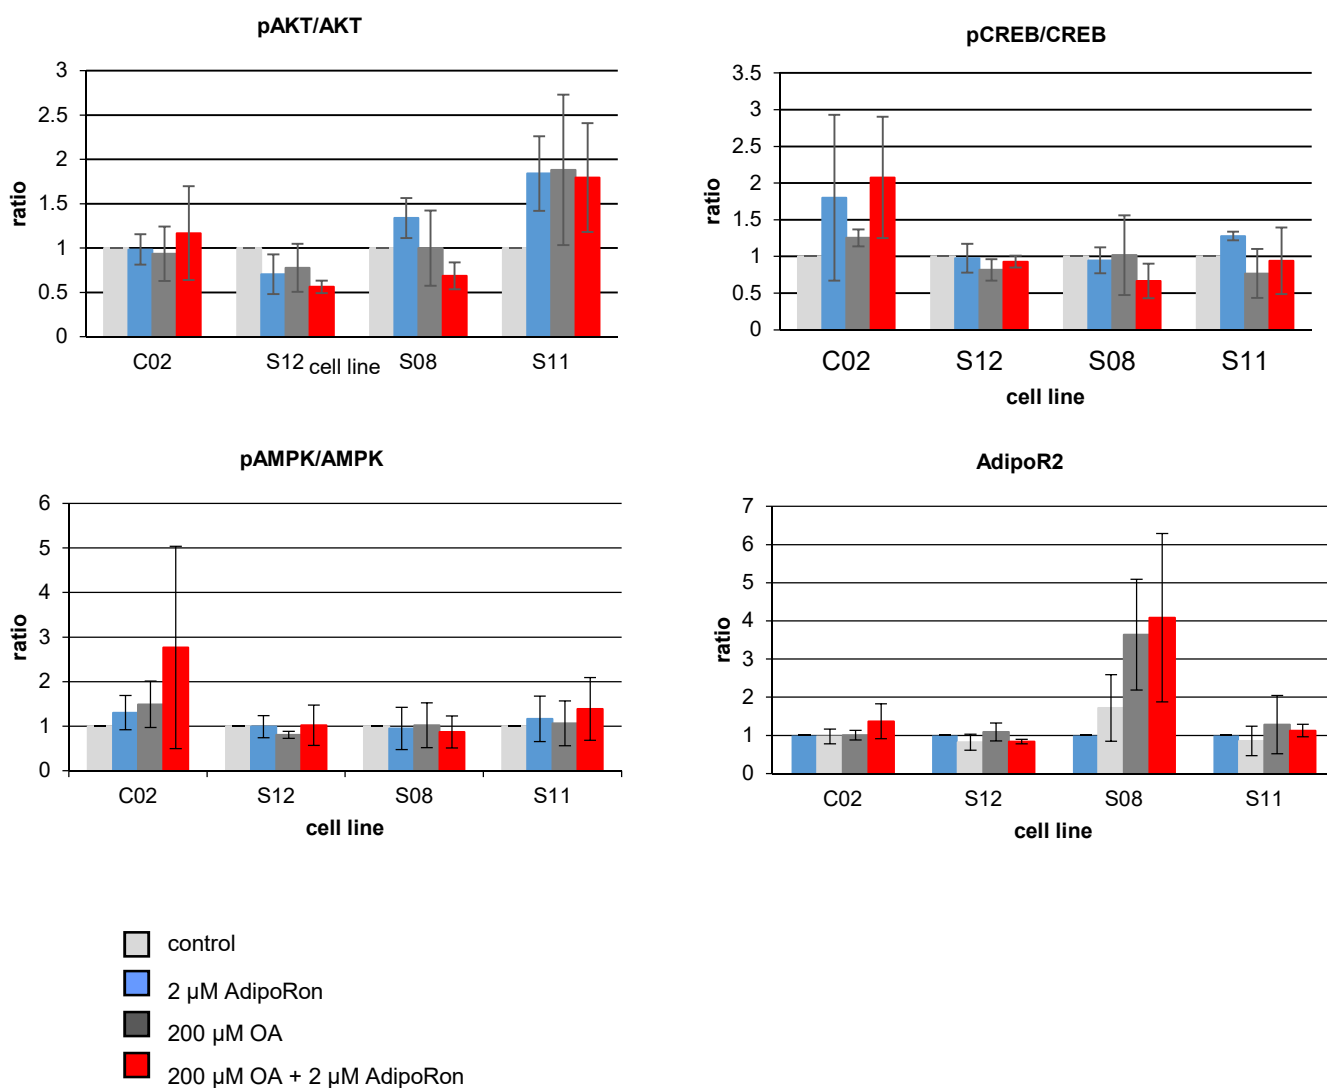

**Fig. S3: Quantification of Western Blots for metabolic master regulators.** Western Blots for the indicated factors as well as for  $\beta$ -ACTIN were performed in triplicates for each cell line. All bands were normalized to  $\beta$ -ACTIN. The ratio between the phosphorylated and the non-phosphorylated isoform was calculated. Depicted are means of 3 biological replicates  $\pm$  SD.

### Supplementary Fig. S4

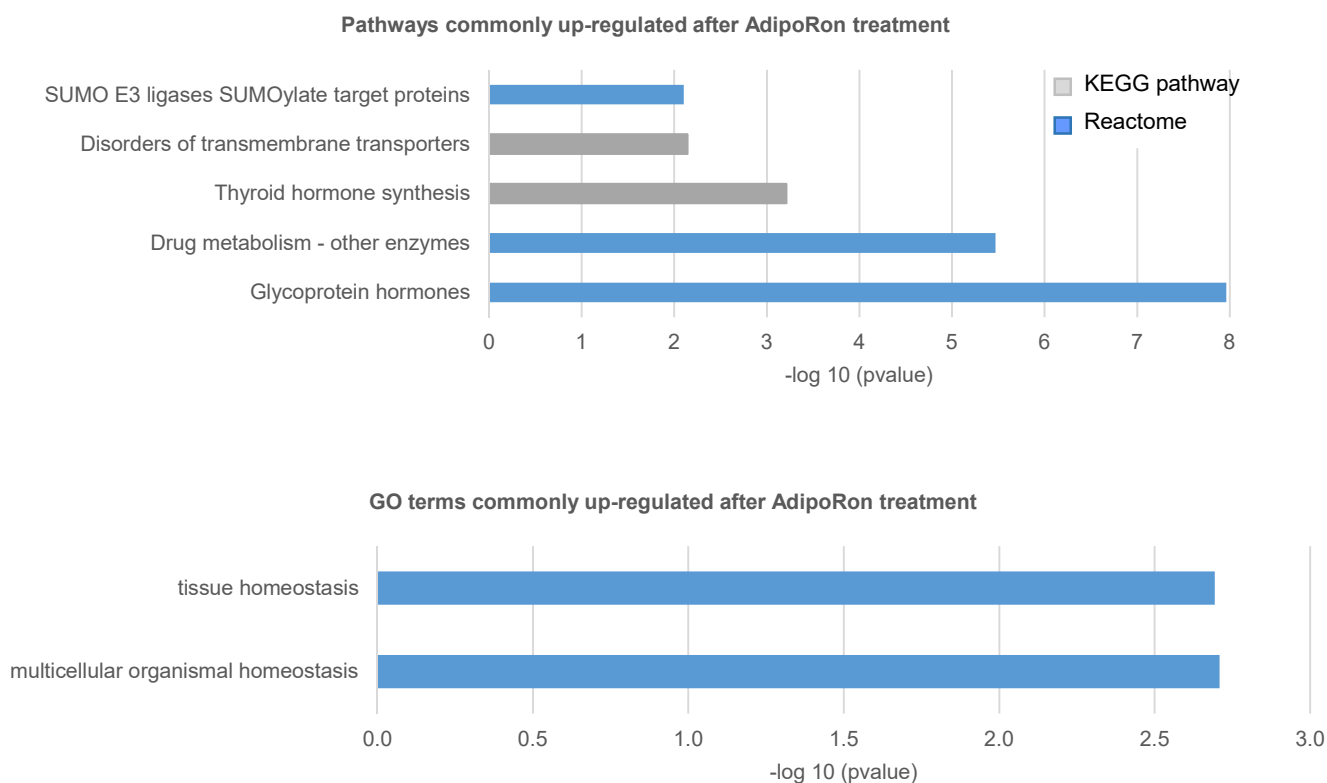

**Fig. S4: Commonly AdipoRon regulated genes.** Metascape was used to perform pathway enrichment analysis for genes that were commonly up- and down- regulated in control and OA treated cells.

Table S1

[Click here to Download Table S1](#)

**Table S2: Antibodies**

| Antibody       | species | company     | Order number | dilution | Application | Blocking              |
|----------------|---------|-------------|--------------|----------|-------------|-----------------------|
| ALB            | mouse   | Sigma       | A6684-.2ml   | 1:500    | ICC         | 10% normal goat serum |
| AFP            | rabbit  | Sigma       | HPA023600    | 1:250    | ICC         | 10% normal goat serum |
| ECAD           | rabbit  | CST         | 3195         | 1:200    | ICC         | 10% normal goat serum |
| HNF4 $\alpha$  | rabbit  | Abcam       | 92378        | 1:250    | ICC         | 10% normal goat serum |
| PLIN2          | rabbit  | Proteintech | 15294-1-AP   | 1:200    | ICC         | 10% normal goat serum |
| AKT            | rabbit  | CST         | 9272S        | 1:1000   | WB          | 5% milk TBST          |
| pAKT           | rabbit  | CST         | 9271S        | 1:1000   | WB          | 5% milk TBST          |
| CREB           | rabbit  | CST         | 9197S        | 1:1000   | WB          | 5% milk TBST          |
| pCREB (Ser133) | rabbit  | CST         | 9198S        | 1:1000   | WB          | 5% milk TBST          |
| AMPK           | rabbit  | CST         | 2532S        | 1:1000   | WB          | 5% milk TBST          |
| pAMPK (Thr172) | rabbit  | CST         | 2535S        | 1:1000   | WB          | 5% milk TBST          |
| FGF21          | rabbit  | Abcam       | Ab171941     | 1:1000   | WB          | 5% milk TBST          |
| AdipoR1        | mouse   | Proteintech | 66619-1-Ig   | 1:1000   | WB          | 5% milk TBST          |
| AdipoR2        | rabbit  | Proteintech | 14361-1-AP   | 1:500    | WB          | 5% milk TBST          |
| B-Actin        | mouse   | CST         | 3700S        | 1:5000   | WB          | 5% milk TBST          |

Table S3

[Click here to Download Table S3](#)
